# Supplementary material for: Intranasal administration of resveratrol successfully prevents lung cancer in A/J mice
Source: PubMed Central journal article supplement (PMC6155121; doi:10.1038/s41598-018-32423-0), 2018-09-24
Supplement: 41598_2018_32423_MOESM1_ESM.pdf [file 41598_2018_32423_MOESM1_ESM.pdf]

# **Intranasal administration of resveratrol successfully prevents lung cancer in A/J mice**

Aymeric Monteillier, Aymone Voisin, Pascal Furrer, Eric Allémann, Muriel Cuendet\*

School of pharmaceutical sciences, University of Geneva, University of Lausanne, Rue Michel-Servet 1, CH-1211 Geneva 4, Switzerland

\* To whom correspondence should be addressed. Tel: +41 22 379 33 86; Email:

[muriel.cuendet@unige.ch](mailto:muriel.cuendet@unige.ch)

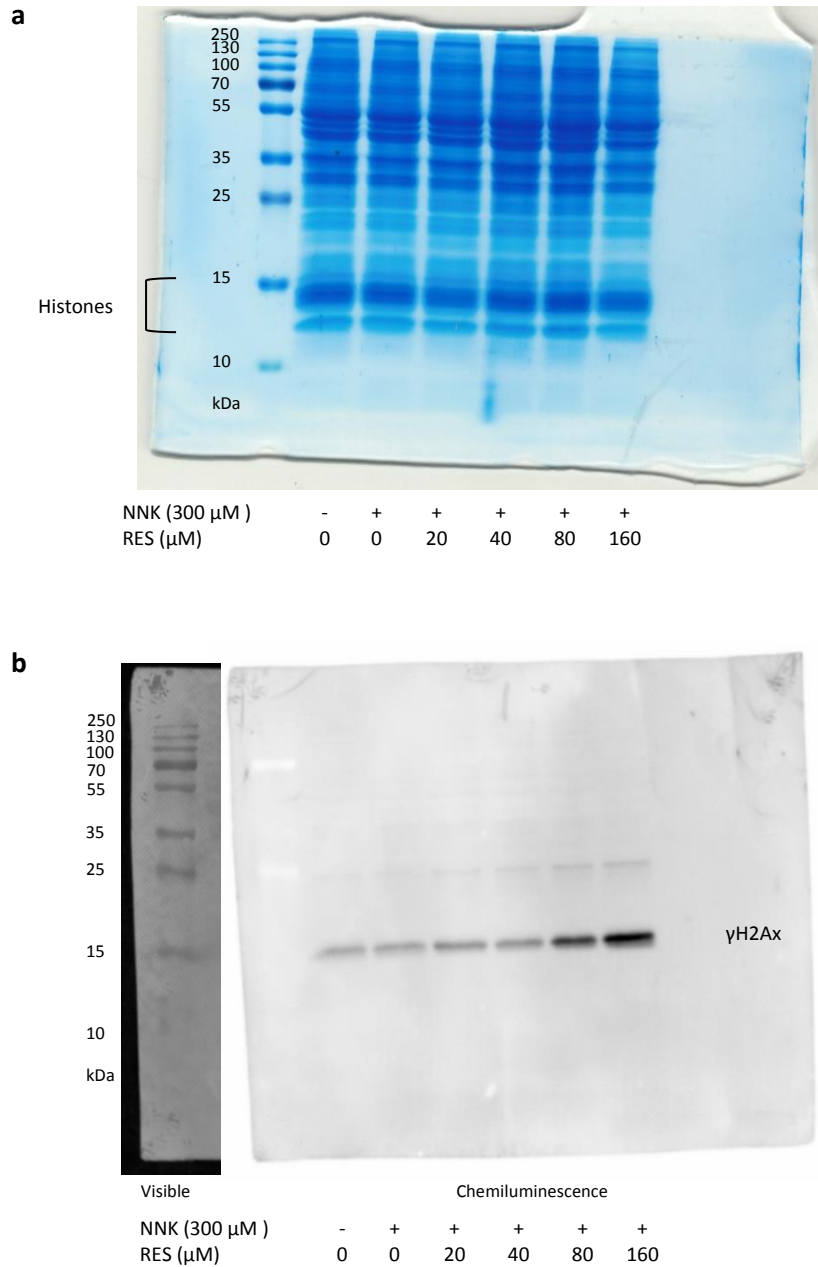

**Supplementary Figure S1:** Full length Coomassie blue stained gel showing histones bands as a loading control (a) and corresponding western blot showing induced  $\gamma$ -H2AX protein expression in A549 cells after RES treatment (b).
